# Supplementary material for: Multicolor emission from a 0D-doped hybrid halide (C8H14N2)2CdBr6 single crystal
Source: Royal Society of Chemistry journal article supplement (doi:10.1039/d4dt03247k), 2025-01-01
Supplement: d4dt03247k1.pdf [file d4dt03247k1.pdf]

## Supplementary material

### *Multicolor emission from hybrid 0D-doped halide (C<sub>8</sub>H<sub>14</sub>N<sub>2</sub>)<sub>2</sub>CdBr<sub>6</sub> single crystal*

Yuchen Xu,<sup>[a]</sup> Wenxiao Dong,<sup>[b]</sup> Shaoli Song,<sup>[a]</sup> Huichao He,<sup>[a]</sup> Hanmei Jiang,<sup>[a]</sup> Bi jia,<sup>[a]</sup>

Xiaoyan liu,<sup>[a]</sup> Jianbei Qiu,<sup>[b]</sup> Tao Han\*<sup>[a]</sup>

[a] College of Materials and New Energy, Chongqing University of Science and Technology

Chongqing, 401331, China

\*E-mail: danbaiht@126.com

[b] School of Materials Science and Engineering, Kunming University of Science and Technology

Kunming, 650093, Yunnan, P. R. China

**Table S1** Crystal data for C<sub>16</sub>H<sub>28</sub>N<sub>4</sub>CdBr<sub>6</sub>

| Compound         | MXDA <sub>2</sub> CdBr <sub>6</sub>                              |
|------------------|------------------------------------------------------------------|
| Chemical formula | C <sub>16</sub> H <sub>28</sub> N <sub>4</sub> CdBr <sub>6</sub> |
| Fw               | 868.28                                                           |
| Space group      | P1                                                               |
| a/Å              | 7.961(5)                                                         |
| b/Å              | 8.835(5)                                                         |
| c/Å              | 10.498(6)                                                        |
| α/°              | 100.288(18)                                                      |
| β/°              | 101.344(18)                                                      |
| γ/°              | 112.861(17)                                                      |
| Volume           | 640.0(6)                                                         |

**Table S2** Rietveld refinement of the (MXDA)<sub>2</sub>CdBr<sub>6</sub>:M<sup>n+</sup> samples

| Doped ion<br>(M <sup>n+</sup> ) | Space<br>group | A (Å) | B (Å) | C (Å)      | Cell volume<br>(Å <sup>3</sup> ) | R <sub>wp</sub> | R <sub>p</sub> |
|---------------------------------|----------------|-------|-------|------------|----------------------------------|-----------------|----------------|
| M=Cu <sup>+</sup>               | P 1            | 7.940 | 8.835 | 10.48<br>3 | 638.0                            | 12.01<br>%      | 9.05<br>%      |
| M=Mn <sup>2+</sup>              | P 1            | 7.959 | 8.835 | 10.49<br>6 | 639.4                            | 11.23<br>%      | 8.03           |
| M=Sb <sup>3+</sup>              | P 1            | 7.950 | 8.835 | 10.49<br>5 | 639.8                            | 12.53<br>%      | 9.43<br>%      |

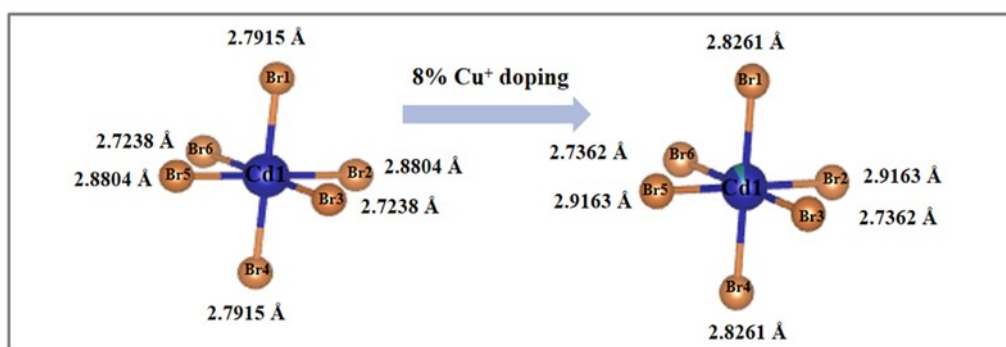

**Figure S1** Variation of Cd-Br bond lengths in  $[\text{CdBr}_6]^{4-}$  octahedra in  $(\text{MXDA})_2\text{CdBr}_6$  before and after 8%Cu<sup>+</sup> doping

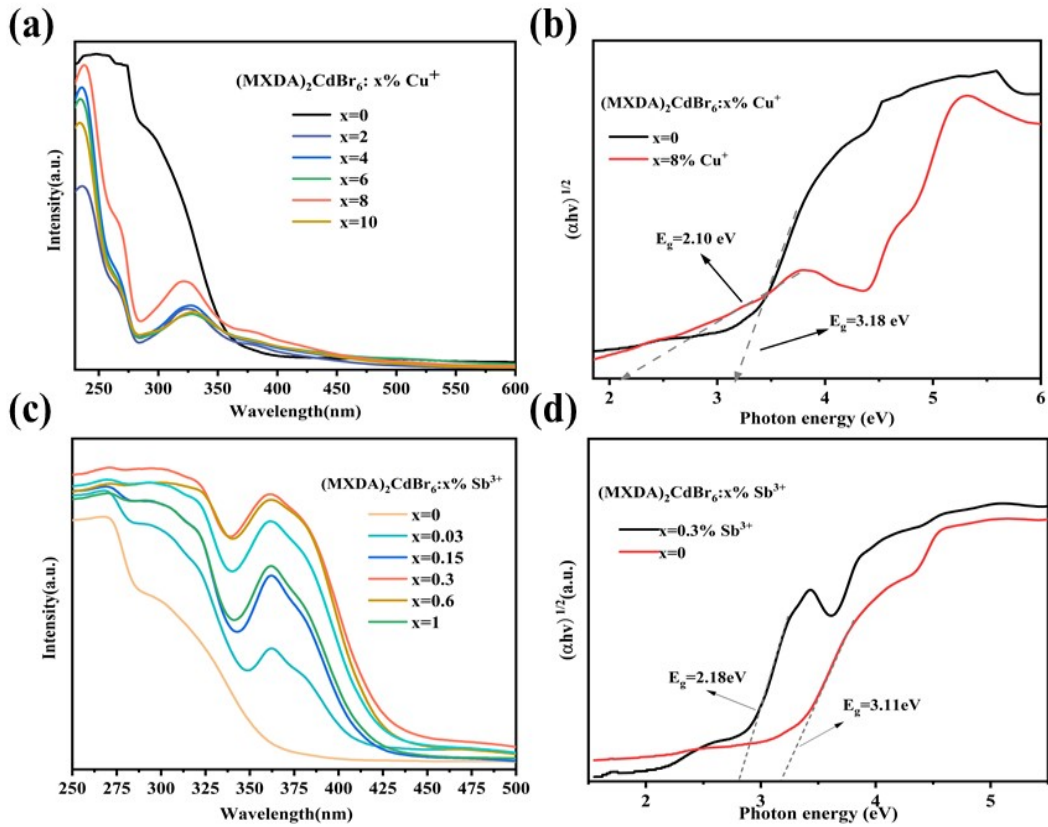

**Figure S2** (a) UV-vis absorption spectra of (MXDA)<sub>2</sub>CdBr<sub>6</sub>:x%Cu<sup>+</sup> sample, (b) Tauc plots of (MXDA)<sub>2</sub>CdBr<sub>6</sub> and (MXDA)<sub>2</sub>CdBr<sub>6</sub>:x%Cu<sup>+</sup> samples, (c) UV-Vis absorption spectra of (MXDA)<sub>2</sub>CdBr<sub>6</sub>:x%Sb<sup>3+</sup> (x=0-1) sample, and (d) Tauc plots of (MXDA)<sub>2</sub>CdBr<sub>6</sub> and (MXDA)<sub>2</sub>CdBr<sub>6</sub>:x%Sb<sup>3+</sup> samples

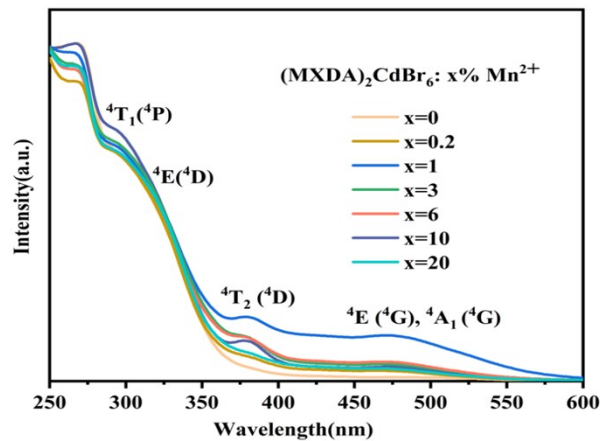

**Figure S3** UV-Vis absorption spectra of (MXDA)<sub>2</sub>CdBr<sub>6</sub>:x%Mn<sup>2+</sup> samples

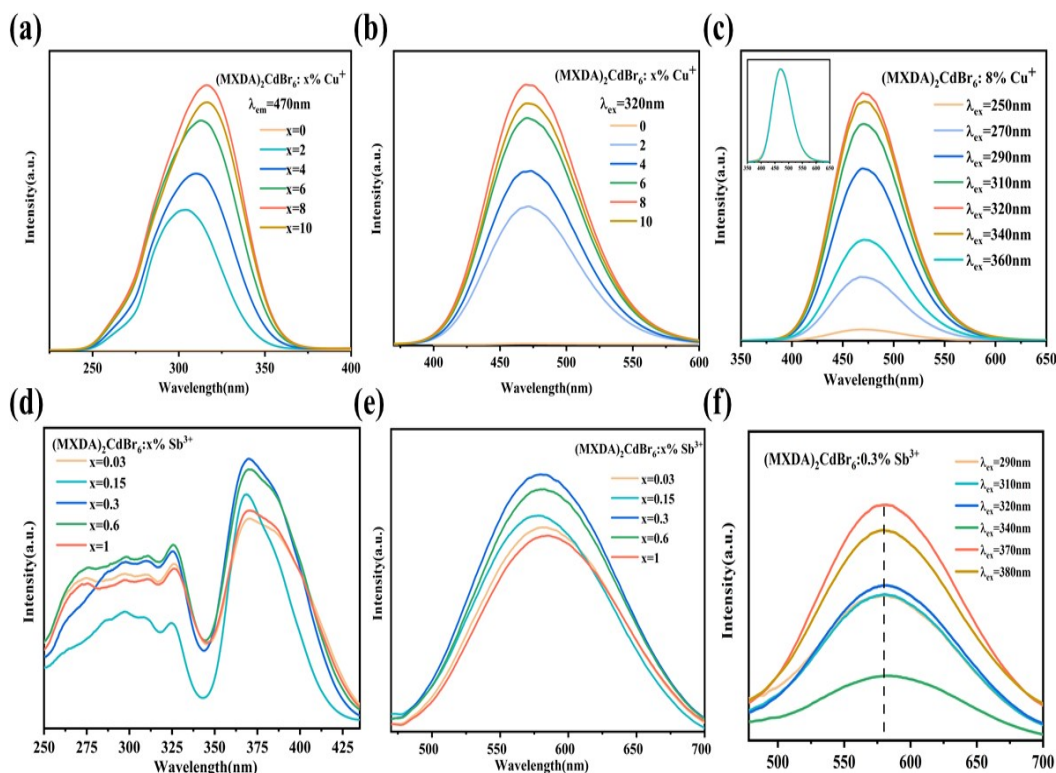

**Figure S4** (a) PLE spectra ( $\lambda_{em}=470$  nm) of  $(MXDA)_2CdBr_6:x\%Cu^+$  samples, (b) PL spectra of  $(MXDA)_2CdBr_6:x\%Cu^+$  samples ( $\lambda_{ex}=370$  nm), (c) variable excitation spectrum of  $(MXDA)_2CdBr_6:8\%Cu^+$  ( $\lambda_{em} = 250-360$  nm), (d) PLE spectrum of  $(MXDA)_2CdBr_6:x\%Sb^{3+}$  sample ( $\lambda_{em}=580$  nm), (e) PL spectrum of  $(MXDA)_2CdBr_6:x\%Sb^{3+}$  sample ( $\lambda_{ex}=370$  nm), and (f) variable excitation spectrum of  $(MXDA)_2CdBr_6:0.3\%Sb^{3+}$  ( $\lambda_{em} = 290-380$  nm)

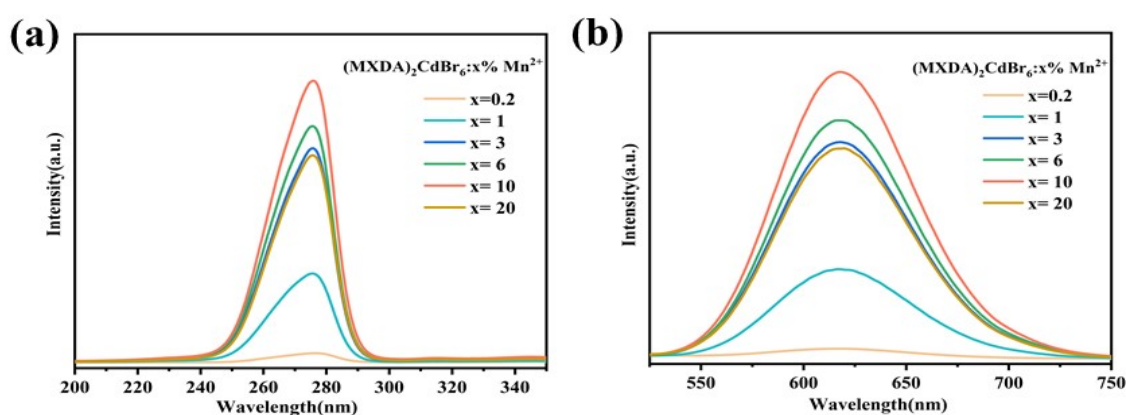

**Figure S5** (a) PLE spectra ( $\lambda_{em}=618$  nm) of  $(MXDA)_2CdBr_6:x\%Mn^{2+}$  samples, and (b) PL spectra of  $(MXDA)_2CdBr_6:x\%Mn^{2+}$  samples ( $\lambda_{ex}=275$  nm),

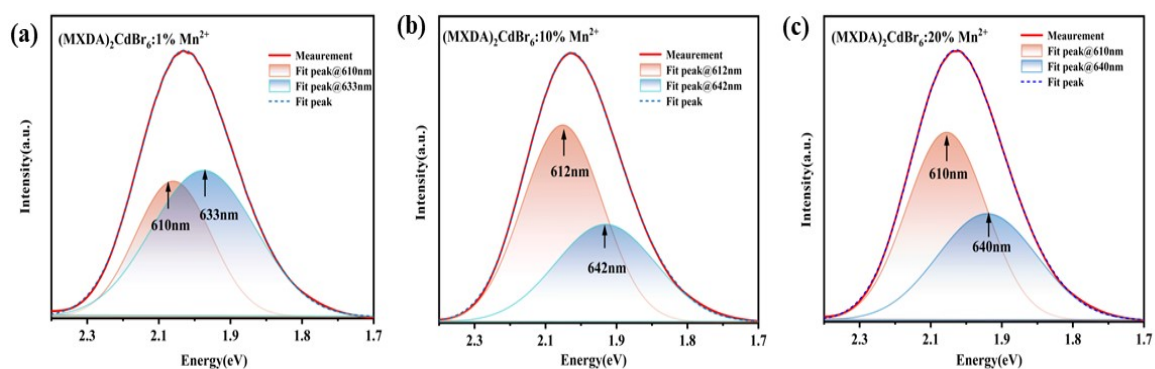

**Figure S6** Multi-peak fitting results of PL spectra of  $(\text{MXDA})_2\text{CdBr}_6:x\%\text{Mn}^{2+}$  ( $x=1, 10, 20$ )

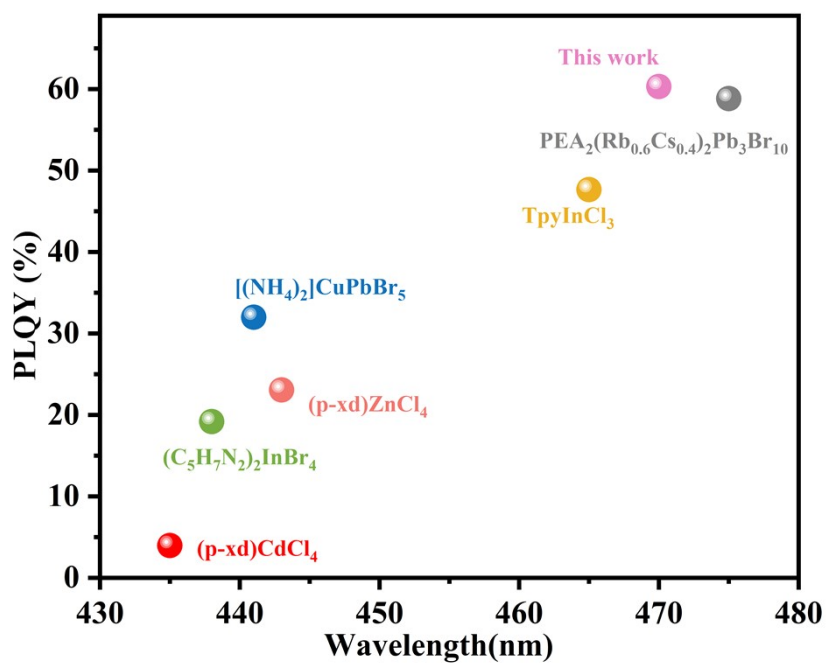

**Figure S7** PLQY variation of blue light emission from the organic-inorganic hybrid perovskites in previous studies<sup>1-5</sup>

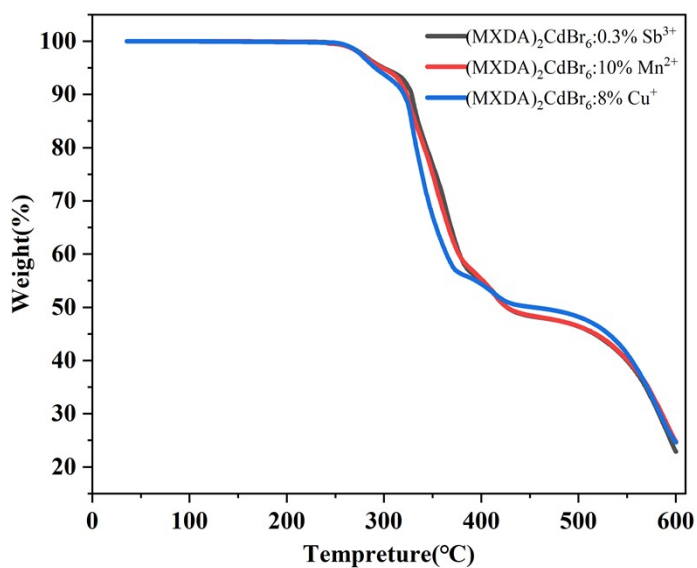

**Figure S8** TGA profiles of (MXDA)<sub>2</sub>CdBr<sub>6</sub>:M<sup>n+</sup> (M<sup>n+</sup>=Cu<sup>+</sup>, Sb<sup>3+</sup>, Mn<sup>2+</sup>)

#### Reference:

- [1] Y. Zhang, S. Yuan, Y. Yuan, Y. Bao, Q. Ran, E. Liu, J. Fan and W. Li, *Advanced Optical Materials*, 2022, 10, 2102041.
- [2] E. R. Dohner, A. Jaffe, L. R. Bradshaw and H. I. Karunadasa, *J. Am. Chem. Soc.*, 2014, 136, 13154–13157.
- [3] G. Song, M. Li, Y. Yang, F. Liang, Q. Huang, X. Liu, P. Gong, Z. Xia and Z. Lin, *J. Phys. Chem. Lett.*, 2020, 11, 1808–1813.
- [4] S. Gao, S. Wang, J. Wu and Z. Lin, *J. Mater. Chem. C*, 2023, 11, 16890–16911.
- [5] H. Fattal, T. D. Creason, C. J. Delzer, A. Yangui, J. P. Hayward, B. J. Ross, M.-H. Du, D. T. Glatzhofer and B. Saparov, *Inorg. Chem.*, 2021, 60, 1045–1054.
